# Supplementary material for: Lipidomic profiling of exosomes from colorectal cancer cells and patients reveals potential biomarkers
Source: PubMed Central journal article supplement (PMC9298677; doi:10.1002/1878-0261.13223), 2022-06-14

**(A)**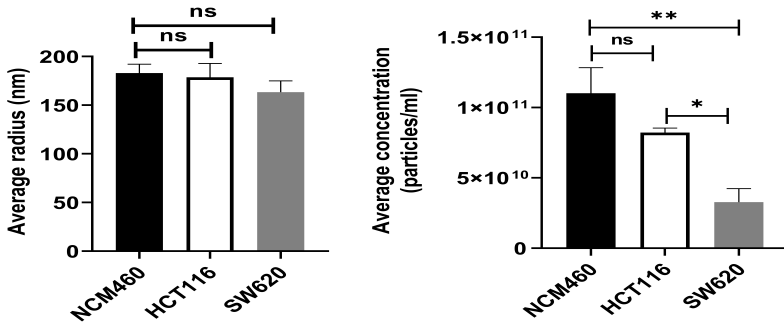**(B)**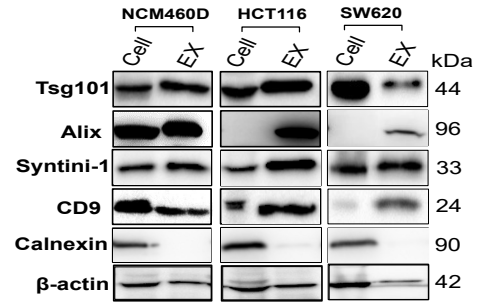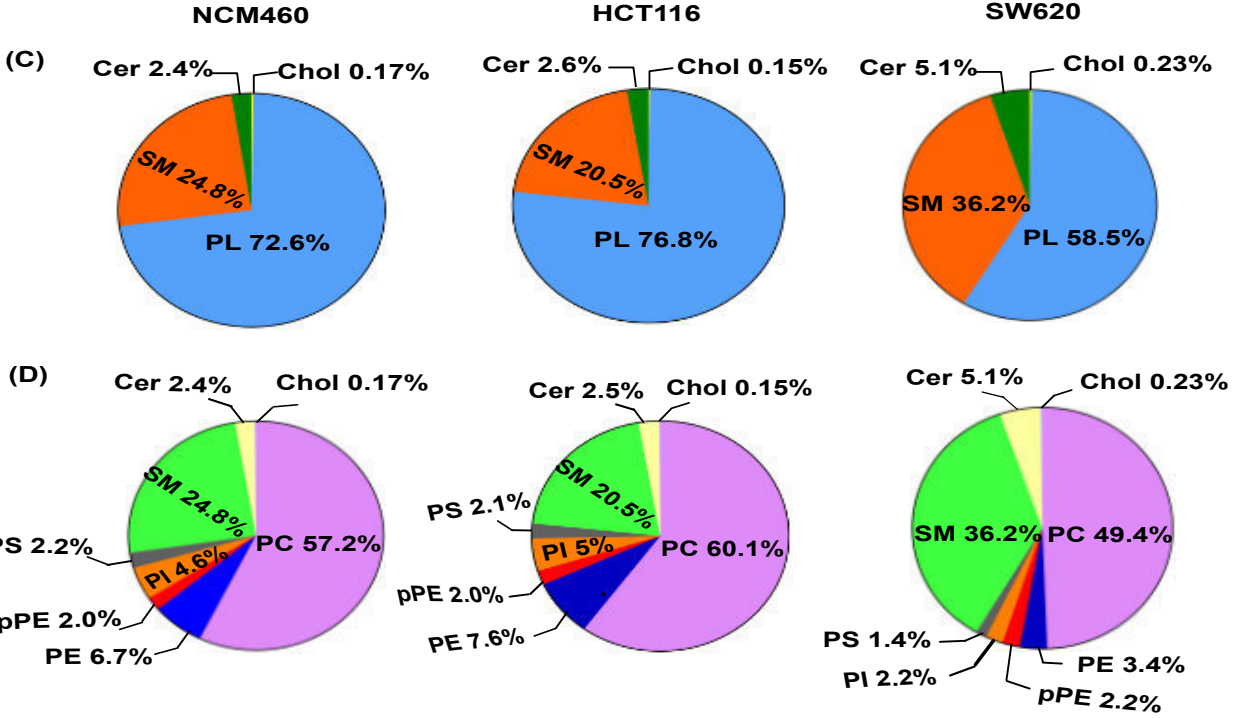

Supplement: MOL2-16-2710-s004.pdf [file MOL2-16-2710-s004.pdf]
