# Supplementary material for: Lipidomic profiling of exosomes from colorectal cancer cells and patients reveals potential biomarkers
Source: PubMed Central journal article supplement (PMC9298677; doi:10.1002/1878-0261.13223), 2022-06-14
Supplement: MOL2-16-2710-s007.pdf [file MOL2-16-2710-s007.pdf]

**Table S1**

| Lipid Class   | Lipid sub-class | Cell line-derived exosomes |        |       | Plasma-derived exosomes |                              |                         |
|---------------|-----------------|----------------------------|--------|-------|-------------------------|------------------------------|-------------------------|
|               |                 | NCM460                     | HCT116 | SW620 | Healthy control (HC)    | Non-metastatic (NM) patients | Metastatic (M) patients |
|               |                 | Total lipid ion            |        |       |                         |                              |                         |
| Phospholipids | LPC             | 7                          | 7      | 5     | 13                      | 13                           | 13                      |
|               | PC              | 28                         | 28     | 27    | 29                      | 29                           | 29                      |
|               | LPE             | 3                          | 3      | 5     | 7                       | 7                            | 7                       |
|               | PE              | 26                         | 26     | 12    | 22                      | 22                           | 22                      |
|               | pPE             | 23                         | 23     | 17    | 25                      | 25                           | 25                      |
|               | LPS             | 2                          | 2      | 1     | -                       | -                            | -                       |
|               | PS              | 7                          | 7      | 2     | 8                       | 8                            | 8                       |
|               | PI              | 13                         | 13     | 7     | 9                       | 9                            | 9                       |
| Sphingolipids | SM              | 16                         | 16     | 16    | 15                      | 15                           | 15                      |
|               | Cer             | 25                         | 25     | 23    | 26                      | 26                           | 26                      |
|               | HexCer          | 17                         | 17     | 11    | 14                      | 14                           | 14                      |
|               | LacCer          | 2                          | 2      | 2     | 4                       | 4                            | 4                       |
|               | DHCer           | 5                          | 5      | 3     | 5                       | 5                            | 5                       |
| Sterol lipids | Chol            | 1                          | 1      | 1     | 1                       | 1                            | 1                       |
| Total lipid   |                 | 175                        | 175    | 132   | 178                     | 178                          | 178                     |
